# Supplementary material for: Is SH4, the simplest 10-S-4 sulfurane, observable?
Source: Royal Society of Chemistry journal article supplement (doi:10.1039/b000597p), 2000-01-01
Supplement: support_material.doc [file support_material.doc]

Is SH4, the Simplest 10-S-4 Sulfurane, Isolable?

# Alexander Wittkopp,§ Matthias Prall, § Peter R. Schreiner,§ and Henry F. Schaefer III‡

Contribution from the (§) Institut für Organische Chemie der Georg-August-Universität, Tammannstr. 2, 37077 Göttingen, Germany and the (‡) Center for Computational Quantum Chemistry, University of Georgia, Athens, Georgia 30602-2556, USA.

**Supporting Material**

HF/6-31+G*

**H2**:

| H | 0.0 | 0.0 | -0.3648504264 |
| --- | --- | --- | --- |
| H | 0.0 | 0.0 | 0.3648504264 |

E = -1.12683au

ZPVE = 6.65 kcal mol1

Frequency data : 4650.08 cm1

**SH2**:

| S | -0.0767265161 | 0.0 | -0.0643811914 |
| --- | --- | --- | --- |
| H | -0.0118000935 | 0.0 | 1.2606251443 |
| H | 1.239424351 | 0.0 | -0.2305260826 |

E = -398.66811 au

ZPVE = 10.31 kcal mol1

Frequency data : 1364.54, 2917.05, 2928.96 cm1

***C*2v** – TS:

| S | 0.0 | 0.0 | -0.1697648007 |
| --- | --- | --- | --- |
| H | 1.427629602 | 0.0 | 0.1341506857 |
| H | -1.427629602 | 0.0 | 0.1341506857 |
| H | 0.0 | 0.5064274826 | 1.2239677201 |
| H | 0.0 | -0.5064274826 | 1.2239677201 |

E = -399.55655 au

ZPVE = 19.66 kcal mol1

Frequency data : 2069.07*i* cm1

***C*1** – TS:

| S | 0.0994539298 | -0.0295989504 | -0.0900264378 |
| --- | --- | --- | --- |
| H | -0.7821166716 | -0.649916341 | 0.7134344059 |
| H | -2.0862055136 | 0.0768910386 | -0.0883075059 |
| H | 1.3861138179 | -0.1215624976 | 0.4106953986 |
| H | -0.1090545088 | 1.1681710057 | 0.4046007069 |

E = -399.61482 au

ZPVE = 19.23 kcal mol1

Frequency data : 1428.70*i* cm1

**SH4**:

| S | 0.0 | 0.0 | -0.0591522064 |
| --- | --- | --- | --- |
| H | 1.3452420574 | 0.0 | 0.2366088256 |
| H | 0.0 | 1.3452420574 | 0.2366088256 |
| H | -1.3452420574 | 0.0 | 0.2366088256 |
| H | 0.0 | -1.3452420574 | 0.2366088256 |

E = -398.66811 au

ZPVE = 10.31 kcal mol1

Frequency data : IR-active: 1651.51, 2384.33 cm1

non-active: 770.0424, 814.8880, 1972.0887, 2231.3107, 2569.6291 cm1

Scaling factor : 0.894

B3LYP/6-31+G*

**H2**:

| H | 0.0 | 0.0 | -0.3714073 |
| --- | --- | --- | --- |
| H | 0.0 | 0.0 | 0.3714073 |

E = -1.17548 au

ZPVE = 6.36526 kcal mol1

Frequency data : 4452.56190 cm1

**SH2**:

| S | -0.079171 | 0.0 | -0.066432 |
| --- | --- | --- | --- |
| H | 0.0047835 | 0.0 | 1.2805734 |
| H | 1.2619493 | 0.0 | -0.217658 |

E = -399.38728 au

ZPVE = 9.50 kcal mol1

Frequency data : 1248.00, 2688.29, 2708.63 cm1

***C*2v** – TS:

| S | 0.0 | 0.0 | -0.174852 |
| --- | --- | --- | --- |
| H | 1.470238 | 0.0 | 0.1426672 |
| H | -1.470238 | 0.0 | 0.1426672 |
| H | 0.0 | 0.5256103 | 1.256151 |
| H | 0.0 | -0.5256103 | 1.256151 |

E = -400.36992 au

ZPVE = 17.51 kcal mol1

Frequency data : 1817.31*i* cm1

***C*1** – TS:

| S | -0.1089796 | 0.0441289 | -0.035509 |
| --- | --- | --- | --- |
| H | 0.4667988 | -0.3549752 | 1.1476819 |
| H | 1.3041052 | 1.0239749 | 0.9072448 |
| H | -0.9693875 | -0.9936556 | -0.743629 |
| H | 0.9421572 | -0.3814066 | -0.743155 |

E = -400.41525 au

ZPVE = 17.21 kcal mol1

Frequency data : 1431.02*i* cm1

**SH4**:

| S | 0.0 | 0.0 | -0.055935 |
| --- | --- | --- | --- |
| H | 1.3807825 | 0.0 | 0.2237389 |
| H | 0.0 | 1.3807825 | 0.2237389 |
| H | -1.3807825 | 0.0 | 0.2237389 |
| H | 0.0 | -1.3807825 | 0.2237389 |

E = -400.44502 au

ZPVE = 21.26 kcal mol1

Frequency data : IR-active: 1533.85, 2101.79 cm1

non-active: 638.82, 798.62, 1826.99, 2032.21, 2302.2527 cm1

Scaling factor : 0.950

B3LYP/cc-pVTZ

**H2**:

| H | 0.0 | 0.0 | -0.3714751 |
| --- | --- | --- | --- |
| H | 0.0 | 0.0 | 0.3714751 |

E = -1.18000 au

ZPVE = 6.32 kcal mol1

Frequency data : 4418.96 cm1

**SH2**:

| S | -0.074263398 | 0.0 | 0.07171533 |
| --- | --- | --- | --- |
| H | 1.269251217 | 0.0 | 0.12540947 |
| H | -0.081036847 | 0.0 | -1.2728548 |

E = -399.43105 au

ZPVE = 9.42 kcal mol1

Frequency data : 1209.86, 2682.90, 2696.64 cm1

***C*2v** – TS:

| S | 0.0 | 0.0 | -0.175422 |
| --- | --- | --- | --- |
| H | 1.46898413 | 0.0 | 0.15318058 |
| H | -1.46898413 | 0.0 | 0.15318058 |
| H | 0.0 | 0.51559818 | 1.25019556 |
| H | 0.0 | -0.51559818 | 1.25019556 |

E = -400.43156 au

ZPVE = 17.43 kcal mol1

Frequency data : 1703.20*i*

***C*1** – TS:

| S | 0.07131477 | -0.04111 | -0.0902992 |
| --- | --- | --- | --- |
| H | -0.7983427 | -0.5961507 | 0.80697675 |
| H | -1.8280049 | 0.1215273 | -0.1536341 |
| H | 1.53914992 | -0.0306795 | 0.31892182 |
| H | -0.0538387 | 1.16306335 | 0.47252325 |

E = -400.47176 au

ZPVE = 17.21 kcal mol1

Frequency data : 1375.75*i* cm1

**SH4**:

| S | 0.0 | 0.0 | -0.0613947 |
| --- | --- | --- | --- |
| H | 1.37258618 | 0.0 | 0.24557867 |
| H | 0.0 | 1.37258618 | 0.24557867 |
| H | -1.37258618 | 0.0 | 0.24557867 |
| H | 0.0 | -1.37258618 | 0.24557867 |

E = -400.49758 au

ZPVE = 20.87 kcal mol1

Frequency data : IR-active: 1493.45, 2075.04340 cm1

non-active: 692.98, 725.15, 1769.78, 1989.75, 2283.00 cm1

Scaling factor : 0.957

BLYP/6-31+G*

**H2**:

| H | 0.0. | 0.0. | -0.373929 |
| --- | --- | --- | --- |
| H | 0.0. | 0.0. | 0.373929 |

E = -1.16526 au

ZPVE = 6.65 kcal mol1

Frequency data : 4375.67 cm1

**SH2**:

| S | -0.080219415 | 0.0 | -0.0673121 |
| --- | --- | --- | --- |
| H | 0.009568438 | 0.0 | 1.29190764 |
| H | 1.273942201 | 0.0 | -0.2149143 |

E = -399.35933 au

ZPVE = 9.14 kcal mol1

Frequency data : 1210.84, 2581.74, 2604.13 cm1

***C*2v** – TS:

| S | 0.0 | 0.0 | -0.1771479 |
| --- | --- | --- | --- |
| H | 1.49650213 | 0.0 | 0.14470972 |
| H | -1.49650213 | 0.0 | 0.14470972 |
| H | 0.0 | 0.53327409 | 1.27247323 |
| H | 0.0 | -0.53327409 | 1.27247323 |

E = -400.34087 au

ZPVE = 16.51 kcal mol1

Frequency data : -1749.38*i* cm1

***C*1** – TS:

| S | -0.0874127 | -0.0249227 | 0.08099863 |
| --- | --- | --- | --- |
| H | 1.30042285 | -0.0557006 | 0.07408276 |
| H | 1.03361819 | 1.5853081 | 0.10590216 |
| H | -0.1182414 | 0.25315051 | -1.2389265 |
| H | -0.8171968 | -1.3839947 | -0.2370365 |

E = -400.38603 au

ZPVE = 16.34 kcal mol1

Frequency data : 1310.79*i* cm1

**SH4**:

| S | 0.0 | 0.0 | -0.0585549 |
| --- | --- | --- | --- |
| H | 1.39536363 | 0.0 | 0.23421961 |
| H | 0.0 | 1.39536363 | 0.23421961 |
| H | -1.39536363 | 0.0 | 0.23421961 |
| H | 0.0 | -1.39536363 | 0.23421961 |

E = -400.40928 au

ZPVE = 20.30 kcal mol1

Frequency data : IR-active: 1493.79, 1971.03 cm1

non-active: 628.95, 753.25, 1772.7, 1929.53, 2184.95 cm1

Scaling factor : 0.977

BLYP/cc-pVTZ

**H2**:

| H | 0.0 | 0.0 | -0.37330136 |
| --- | --- | --- | --- |
| H | 0.0 | 0.0 | 0.37330136 |

E = -1.16959 au

ZPVE = 6.22 kcal mol1

Frequency data : 4349.20 cm1

**SH2**:

| S | -0.079935526 | 0.0 | -0.0670739 |
| --- | --- | --- | --- |
| H | 0.012094713 | 0.0 | 1.28428465 |
| H | 1.266873704 | 0.0 | -0.2111027 |

E = -399.40308 au

ZPVE = 9.13 kcal mol1

Frequency data : 1178.76, 2594.66, 2609.72 cm1

***C*2v** – TS:

| S | 0.0 | 0.0 | -0.1774383 |
| --- | --- | --- | --- |
| H | 1.49030436 | 0.0 | 0.15534521 |
| H | -1.49030436 | 0.0 | 0.15534521 |
| H | 0.0 | 0.52197497 | 1.26416149 |
| H | 0.0 | -0.52197497 | 1.26416149 |

E = -400.40011 au

ZPVE = 16.53 kcal mol1

Frequency data : 1658.75*i* cm1

***C*1** – TS:

| S | -0.0866958 | -0.0226718 | 0.08222964 |
| --- | --- | --- | --- |
| H | 1.28989854 | -0.0507881 | 0.07129917 |
| H | 1.02078986 | 1.5416583 | 0.09193037 |
| H | -0.1177968 | 0.24979891 | -1.234655 |
| H | -0.8057589 | -1.3779198 | -0.2442487 |

E = -400.44063 au

ZPVE = 16.43 kcal mol1

Frequency data : 1266.66*i* cm1

**SH4**:

| S | 0.0 | 0.0 | -0.0635962 |
| --- | --- | --- | --- |
| H | 1.38537035 | 0.0 | 0.25438486 |
| H | 0.0 | 1.38537035 | 0.25438486 |
| H | -1.38537035 | 0.0 | 0.25438486 |
| H | 0.0 | -1.38537035 | 0.25438486 |

E = -400.46102 au

ZPVE = 19.98432 kcal mol1

Frequency data : IR-active: 1457.01, 1952.94 cm1

non-active: 679.45, 686.77, 1720.04, 1896.19, 2176.89 cm1

Scaling factor : 0.980

MP2(full)/6-31+G*

**H2**:

| H | 0.0 | 0.0 | -0.36878035 |
| --- | --- | --- | --- |
| H | 0.0 | 0.0 | 0.36878035 |

E = -1.14414 au

ZPVE = 6.48 kcal mol1

Frequency data : 4532.99 cm1

**SH2**:

| S | -0.078224064 | 0.0 | -0.0656378 |
| --- | --- | --- | --- |
| H | -0.000674367 | 0.0 | 1.27169642 |
| H | 1.252259394 | 0.0 | -0.2214919 |

E = -398.80108 au

ZPVE = 9.84 kcal mol1

Frequency data : 1275.84, 2790.31, 2817.93 cm1

***C*2v** – TS:

| S | 0.0 | 0.0 | -0.1727277 |
| --- | --- | --- | --- |
| H | 1.44920745 | 0.0 | 0.13971169 |
| H | -1.44920745 | 0.0 | 0.13971169 |
| H | 0.0 | 0.51609232 | 1.24211029 |
| H | 0.0 | -0.51609232 | 1.24211029 |

E = -399.72451 au

ZPVE = 18.47 kcal mol1

Frequency data : 1969.94*i* cm1

***C*1** – TS:

| S | -0.1106652 | 0.03698816 | -0.044912 |
| --- | --- | --- | --- |
| H | 0.40580926 | -0.3479481 | 1.15779798 |
| H | 1.23005923 | 1.07487222 | 1.03070057 |
| H | -0.8599606 | -1.0263713 | -0.7705837 |
| H | 0.99473561 | -0.2923634 | -0.6993223 |

E = -399.77433 au

ZPVE = 17.63 kcal mol1

Frequency data : 1486.29*i* cm1

**SH4**:

| S | 0.0 | 0.0 | -0.0525677 |
| --- | --- | --- | --- |
| H | 1.36737012 | 0.0 | 0.21027097 |
| H | 0.0 | 1.36737012 | 0.21027097 |
| H | -1.36737012 | 0.0 | 0.21027097 |
| H | 0.0 | -1.36737012 | 0.21027097 |

E = -399.80802au

ZPVE = 22.44837 kcal mol1

Frequency data : IR-active: 1589.86, 2257.06 cm1

non-active: 662.10, 863.29, 1886.70, 2162.44, 2434.48 cm1

Scaling factor : 0.925

MP2(full)/cc-pVTZ

**H2**:

| H | 0.0 | 0.0 | -0.36854437 |
| --- | --- | --- | --- |
| H | 0.0 | 0.0 | 0.36854437 |

E = -1.16465 au

ZPVE = 6.47 kcal mol1

Frequency data : 4525.32 cm1

**SH2**:

| S | -0.078593062 | 0.0 | -0.0659474 |
| --- | --- | --- | --- |
| H | 0.01157802 | 0.0 | 1.26308965 |
| H | 1.245910978 | 0.0 | -0.2079311 |

E = -398.93962 au

ZPVE = 9.73 kcal mol1

Frequency data : 1218.48, 2784.38, 2802.62 cm1

***C*2v** – TS:

| S | 0.0 | 0.0 | -0.1753891 |
| --- | --- | --- | --- |
| H | 1.43244302 | 0.0 | 0.16003403 |
| H | -1.43244302 | 0.0 | 0.16003403 |
| H | 0.0 | 0.50567797 | 1.24307862 |
| H | 0.0 | -0.50567797 | 1.24307862 |

E = -399.91698 au

ZPVE = 18.64 kcal mol1

Frequency data : 1765.51*i* cm1

***C*1** – TS:

| S | -0.1085981 | 0.03920954 | -0.0337934 |
| --- | --- | --- | --- |
| H | 0.46793034 | -0.3378143 | 1.13991772 |
| H | 1.11324208 | 1.01004547 | 0.91973362 |
| H | -0.8319954 | -1.0214614 | -0.8169931 |
| H | 0.9883926 | -0.2781224 | -0.7019633 |

E = -399.95488 au

ZPVE = 18.03 kcal mol1

Frequency data : 1531.68*i* cm1

**SH4**:

| S | 0.0 | 0.0 | -0.0548806 |
| --- | --- | --- | --- |
| H | 1.35751063 | 0.0 | 0.21952231 |
| H | 0.0 | 1.35751063 | 0.21952231 |
| H | -1.35751063 | 0.0 | 0.21952231 |
| H | 0.0 | -1.35751063 | 0.21952231 |

E = -399.98711 au

ZPVE = 22.06 kcal mol1

Frequency data : IR-active: 1536.90, 2253.42 cm1

non-active: 629.35, 824.61, 1825.64, 2145.36, 2424.63 cm1

Scaling factor : 0.930

QCISD/cc-pVTZ

**H2**:

| H | 0.0 | 0.0 | -0.37110022 |
| --- | --- | --- | --- |
| H | 0.0 | 0.0 | 0.37110022 |

E = -1.17234 au

ZPVE = 6.31 kcal mol1

Frequency data : 4415.47 cm1

**SH2**:

| S | -0.078760989 | 0.0 | -0.0660883 |
| --- | --- | --- | --- |
| H | 0.00825623 | 0.0 | 1.26977668 |
| H | 1.251919595 | 0.0 | -0.2123636 |

E = -398.92770 au

ZPVE = 9.59 kcal mol1

Frequency data : 1218.79, 2736.05, 2750.55 cm1

***C*2v** – TS:

| S | 0.0 | 0.0 | -0.1742426 |
| --- | --- | --- | --- |
| H | 1.45309307 | 0.0 | 0.15538767 |
| H | -1.45309307 | 0.0 | 0.15538767 |
| H | 0.0 | 0.51416281 | 1.23855289 |
| H | 0.0 | -0.51416281 | 1.23855289 |

E = -399.90969 au

ZPVE = 17.93 kcal mol1

Frequency data : 1804.71*i* cm1

***C*1** – TS:

| S | -0.0884849 | -0.0261266 | 0.08010292 |
| --- | --- | --- | --- |
| H | 1.27514556 | -0.0236038 | 0.09130287 |
| H | 1.02676701 | 1.50836248 | 0.08067842 |
| H | -0.1206974 | 0.26919483 | -1.2147035 |
| H | -0.7654559 | -1.3359276 | -0.2389245 |

E = -399.95008 au

ZPVE = 17.49 kcal mol1

Frequency data : 1450.27*i* cm1

**SH4**:

| S | 0.0 | 0.0 | -0.0569976 |
| --- | --- | --- | --- |
| H | 1.36602022 | 0.0 | 0.22799049 |
| H | 0.0 | 1.36602022 | 0.22799049 |
| H | -1.36602022 | 0.0 | 0.22799049 |
| H | 0.0 | -1.36602022 | 0.22799049 |

E = -399.98093 au

ZPVE = 21.51 kcal mol1

Frequency data : IR-active: 1511.75, 2155.78 cm1

non-active: 666.10, 856.1646, 1786.64, 2097.01, 2350.41 cm1

Scaling factor : 0.949

CCSD/cc-pVDZ

**H2**:

| H | 0.0 | 0.0 | 0.0 |
| --- | --- | --- | --- |
| H | 0.76089322 | 0.0 | 0.0 |

E = -1.16306 au

ZPVE = 6.27 kcal mol1

Frequency data : 4382.74 cm1

**SH2**:

| S | 0.0 | 0.0 | 0.0 |
| --- | --- | --- | --- |
| H | 1.338279 | 0.0 | 0.0 |
| H | -0.051045494 | 1.338279 | 0.0 |

E = -398.86311 au

ZPVE = 9.64 kcal mol1

Frequency data : 1218.55, 2749.89, 2772.05 cm1

***C*2v** – TS:

| S | 1 | 0.0 | 0.0 |
| --- | --- | --- | --- |
| H | -0.4239572 | 0.5244432 | 0.0 |
| H | -0.4239572 | -0.5244432 | 0.0 |
| H | 0.66130219 | 0.0 | -1.47251299 |
| H | 0.66130219 | 0.0 | 1.47251299 |

E = -399.82625 au

ZPVE = 17.75830 kcal mol1

Frequency data : 1881.16*i* cm1

***C*1** – TS:

| S | 0.0 | 0.0 | 0.0 |
| --- | --- | --- | --- |
| H | 1.37025782 | 0.0 | 0.0 |
| H | 1.09615192 | 1.53818667 | 0.0 |
| H | -0.0425167 | 0.27856778 | -1.3102079 |
| H | -0.6912014 | -1.3513473 | -0.3224065 |

E = -399.86798 au

ZPVE = 17.50 kcal mol1

Frequency data : 1435.64*i* cm1

**SH4**:

| S | 0.0 | 0.0 | 0.0 |
| --- | --- | --- | --- |
| H | 0.28278037 | 1.3819899 | 0.0 |
| H | 0.28278037 | 0.0 | 1.3819899 |
| H | 0.28278037 | -1.3819899 | 0.0 |
| H | 0.28278037 | 0.0 | -1.3819899 |

E = -399.90046 au

ZPVE = 21.55 kcal mol1

Frequency data : IR-active: 1514.02, 2146.32 cm1

non-active: 641.38, 857.04, 1775.20, 2121.00, 2361.68 cm1

Scaling factor : 0.950

CCSD(T)/cc-pVDZ

**H2**:

| H | 0.0 | 0.0 | 0.0 |
| --- | --- | --- | --- |
| H | 0.760893239 | 0.0 | 0.0 |

E = -1.16366 au

ZPVE = 6.27 kcal mol1

Frequency data : 4382.62cm1

**SH2**:

| S | 0.0 | 0.0 | 0.0 |
| --- | --- | --- | --- |
| H | 1.3511274 | 0.0 | 0.0 |
| H | -0.055419975 | 1.3499904 | 0.0 |

E = -398.87183 au

ZPVE = 9.58 kcal mol1

Frequency data : 1208.58, 2734.25, 2757.76cm1

***C*2v** – TS:

| S | 1.0000000 | 0.0 | 0.0 |
| --- | --- | --- | --- |
| H | -0.4281057 | 0.5272577 | 0.0 |
| H | -0.4281057 | -0.5272577 | 0.0 |
| H | 0.6590842 | -0.0000001 | -1.4773166 |
| H | 0.6590842 | -0.0000001 | 1.4773166 |

E = -399.84313 au

ZPVE = 17.36 kcal mol1

Frequency data : 1866.31*i* cm1

***C*1** – TS:

| S | 0.0 | 0.0 | 0.0 |
| --- | --- | --- | --- |
| H | 1.3720797 | 0.0 | 0.0 |
| H | 1.0843094 | 1.5512314 | 0.0 |
| H | -0.0359072 | 0.2681196 | -1.3145810 |
| H | -0.7055350 | -1.3735206 | -0.3270618 |

E = -399.88673 au

ZPVE = 17.07 kcal mol1

Frequency data : 1354.58*i* cm1

**SH4**:

| S | 0.0 | 0.0 | 0.0 |
| --- | --- | --- | --- |
| H | 0.2857158 | 1.3847267 | 0.0 |
| H | 0.2857158 | 0.0 | 1.3847267 |
| H | 0.2857158 | -1.3847267 | 0.0 |
| H | 0.2857158 | 0.0 | -1.3847267 |

E = -399.91359 au

ZPVE = 21.28 kcal mol1

Frequency data : IR-active: 1502.33, 2104.50 cm1

non-active: 640.98, 849.12, 1757.52, 2099.91, 2325.61 cm1

Scaling factor : 0.953

CCSD(T)/cc-pVTZ

**H2**:

| H | 0.0 | 0.0 | 0.0 |
| --- | --- | --- | --- |
| H | 0.0 | 0.0 | 0.74260111 |

E = -1.17233au

ZPVE = 6.30 kcal mol1

Frequency data : 4409.90 cm1

**SH2**:

| S | 0.0 | 0.0 | 0.0 |
| --- | --- | --- | --- |
| H | 1.337553361 | 0.0 | 0.0 |
| H | -0.053137022 | 1.336497456 | 0.0 |

E = -398.97069 au

ZPVE = 9.54 kcal mol1

Frequency data : 1212.63, 2721.66, 2736.08 cm1

***C*2v** – TS:

| S | 0.0 | 0.0 | 0.0 |
| --- | --- | --- | --- |
| H | 0.33337614 | 1.45164848 | 0.0 |
| H | 0.33337614 | -1.45164848 | 0.0 |
| H | 1.41778397 | 0.0 | 0.51698452 |
| H | 1.41778397 | 0.0 | -0.51698452 |

E = -399.95836 au

ZPVE = 17.67 kcal mol1

Frequency data : 1788.66*i* cm1

***C*1** – TS:

| S | 0.0 | 0.0 | 0.0 |
| --- | --- | --- | --- |
| H | 1.36399107 | 0.0 | 0.0 |
| H | 1.09295398 | 1.52725519 | 0.0 |
| H | -0.0283974 | 0.28325715 | -1.2966031 |
| H | -0.7020742 | -1.3207536 | -0.3272755 |

E = -399.99863 au

ZPVE = 17.22 kcal mol1

Frequency data : 1404.47*i* cm1

**SH4**:

| S | 0.0 | 0.0 | 0.0 |
| --- | --- | --- | --- |
| H | 0.28528742 | 1.36647372 | 0.0 |
| H | 0.28528742 | 0.0 | 1.36647372 |
| H | 0.28528742 | -1.36647372 | 0.0 |
| H | 0.28528742 | 0.0 | -1.36647372 |

E = -400.02758 au

ZPVE = 21.25 kcal mol1

Frequency data : IR-active: 1505.38, 2116.99 cm1

non-active: 645.51, 803.48, 1779.99, 2073.74, 2317.89 mol1

Scaling factor : 0.952

CCSD(T)/cc-pVQZ

**H2**:

| H | 0.0 | 0.0 | 0.0 |
| --- | --- | --- | --- |
| H | 0.0 | 0.0 | 0.74186123 |

E = -1.17379 au

ZPVE = 6.30 kcal mol1

Frequency data : 4403.67 cm1

**SH2**:

| S | 0.0 | 0.0 | 0.0 |
| --- | --- | --- | --- |
| H | 1.337096758 | 0.0 | 0.0 |
| H | -0.053077951 | 1.33604284 | 0.0 |

E = -399.01480 au

ZPVE = 9.51 kcal mol1

Frequency data : 1211.26, 2713.41, 2730.31cm1

***C*2v** – TS:

| S | 0.0 | 0.0 | 0.0 |
| --- | --- | --- | --- |
| H | 0.32938745 | 1.44682351 | 0.0 |
| H | 0.32938745 | -1.44682351 | 0.0 |
| H | 1.41634206 | 0.0 | 0.51518214 |
| H | 1.41634206 | 0.0 | -0.51518214 |

E = -400.00605 au

ZPVE = 17.76 kcal mol1

Frequency data : 1766.33*i* cm1

***C*1** – TS:

| S | 0.0 | 0.0 | 0.0 |
| --- | --- | --- | --- |
| H | 1.364279 | 0.0 | 0.0 |
| H | 1.09308183 | 1.52630858 | 0.0 |
| H | -0.0309089 | 0.28691148 | -1.2954238 |
| H | -0.6969586 | -1.3120197 | -0.3222326 |

E = -400.04549 au

ZPVE = 17.22 kcal mol1

Frequency data : 1410.44*i* cm1

**SH4**:

| S | 0.0 | 0.0 | 0.0 |
| --- | --- | --- | --- |
| H | 0.27142065 | 1.36562206 | 0.0 |
| H | 0.27142065 | 0.0 | 1.36562206 |
| H | 0.27142065 | -1.36562206 | 0.0 |
| H | 0.27142065 | 0.0 | -1.36562206 |

E = -400.07576 au

ZPVE = 21.30 kcal mol1

Frequency data : IR-active: 1501.28, 2135.56 cm1

non-active: 616.15, 821.58, 1780.81, 2086.80, 2321.28 mol1

Scaling factor : 0.954
